# Supplementary material
Source: PubMed Central journal article supplement (PMC2712082)
Supplement: NIHMS101453-supplement-Legends.pdf [file NIHMS101453-supplement-Legends.pdf]

## Supplementary Information

### Supplementary Figure Legends

**Supplementary Figure 1** PML is highly expressed in the HSC compartment. **a**, Fractionated  $Pml^{+/+}$  and  $Pml^{-/-}$  haematopoietic cells were directly flow-sorted onto slides. Cells were stained with anti-mouse Pml (green, middle panels) and DAPI (blue, left panels) and analyzed by confocal microscopy. Representative data are shown (right panels). The number of PML-NBs in 150 randomly selected cells in each lineage was counted ( $n = 3$ ). Data are mean numbers  $\pm$  s.d. in each fraction (right). **b**, Cells of different lineages from healthy volunteers were directly flow-sorted into protein sample buffer and immunoblotted with anti-PML antibody. Representative blots are shown in the left panel. Relative PML protein level normalized to  $\beta$ -actin are shown in the right panel. Asterisks indicate PML isoforms. **c**,  $CD34^+$  immature bone marrow cells express high levels of PML. Bone marrow samples of healthy volunteers ( $n = 5$ ) were stained with anti-PML antibody (brown) and anti-CD34 (red). Representative PML-staining in  $CD34^+$  immature bone marrow cells and committed neutrophils is demonstrated in insets. **d**, Expression of PML in fractionated human haematopoietic cells from patients with CML. Cells were stained with anti-human PML (green, middle panels) and DAPI (blue, left panels) and analyzed by confocal microscopy. Representative data are shown (left panels). The number of PML-NBs in 50 randomly selected cells in each lineage was counted (right panel).

**Supplementary Figure 2** Low PML expression predicts better overall survival in chronic phase CML. Patients receiving imatinib are divided into two groups; low PML group (PML Score 0 or 1) and high PML group (PML Score 2). Overall survival of these patients is shown.  $P$ -value was generated by a log-rank test.

**Supplementary Figure 3** Progenitors numbers and function are normal in 8-week-old  $Pml^{-/-}$  mice. **a**, Number of CMPs (common myeloid progenitors) (left), CLPs (common lymphoid progenitors) (middle), and lineage<sup>-</sup> (right) in WT and  $Pml^{-/-}$  mice. Results are mean relative numbers  $\pm$  s.d. of cells in each fraction. **b, c**, Normal colony forming capacity of  $Pml^{-/-}$  progenitors.  $Pml^{+/+}$  and  $Pml^{-/-}$  KSL cells were cultured on semi-solid medium and colonies were counted as colony forming units in culture (CFU-C) 7 days later (**b**). The high proliferative potential (HPP)-CFC of  $Pml^{+/+}$  and  $Pml^{-/-}$  KSL cells was evaluated using semi-solid culture. HPP-CFCs were identified as either very dense colonies over 0.5 mm diameter or moderately dense colonies over 1 mm diameter (**c**). Data shown are mean numbers  $\pm$  s.d. of colonies ( $n = 3$ ). **d**, Spleen colony formation by  $Pml^{-/-}$  progenitor cells. Irradiated mice were transplanted with  $2.5 \times 10^2$  KSL cells from  $Pml^{+/+}$  or  $Pml^{-/-}$  mice, and spleen colonies were counted on day 12 post-transplant (CFU-S12). Data shown are the mean numbers  $\pm$  s.d. of colonies ( $n = 5$ ).

**Supplementary Figure 4** Defective repopulation capacity of  $Pml^{-/-}$  HSCs. **a**,  $Pml$  deficiency affects all haematopoietic lineages in recipient mice after BMT. Data are mean ratios  $\pm$  s.d. of the number of bone marrow cells in myeloid (left), B (middle) and T (right) cells in wild-type and  $Pml^{-/-}$  mice compared to wild-type mice ( $n = 3$ ). **b**, Minimal contribution by  $Pml^{-/-}$  HSCs in more committed cells is found in recipient mice 6 months after BMT. Recipient mice were transplanted with  $1.5 \times 10^3$  KSL cells from  $Pml^{+/+}$  or  $Pml^{-/-}$  mice plus  $4 \times 10^5$  competitor cells in competition assays. Data shown are the mean relative percentage  $\pm$  s.d. of donor-derived cells in fractionated haematopoietic cells in the bone marrow of recipient mice 4 months (black) and 6 months (gray) after transplantation ( $n = 3$ ).

**c**, At the second transplant cycle, recipients of 500 KSL (left) or 50 CD34<sup>neg</sup>KSL (right)  $Pml^{-/-}$  donor-derived cells showed a significant reduction in survival relative to  $Pml^{+/+}$  KSL recipients.  $P$ -value was generated by a log-rank test. **d**, Defective function of  $Pml^{-/-}$  progenitors after BMT. 4 months after the 1<sup>st</sup> round of BMT, donor-derived KSL cells were cultured on semi-solid medium and colonies were counted as colony forming units in culture (CFU-C) 7 days later ( $n = 3$ ). **e**, Decreased colony-forming capacity of 18-month-old  $Pml^{-/-}$  progenitors. The number of colony-forming progenitor cells derived from 18-month-old  $Pml^{+/+}$  and  $Pml^{-/-}$  mice was determined. Data shown are mean numbers  $\pm$  s.d. ( $n = 3$ ). **f**, Short-term repopulating capacity of  $Pml^{-/-}$  BM cells from 18 months mice. Recipients were transplanted with  $4 \times 10^5$  BM MNCs from 18-month-old  $Pml^{+/+}$  and  $Pml^{-/-}$  mice in a competition assay. Data shown are mean percentages  $\pm$  s.d. of donor-derived cells 1 month (left) and 4 months (right) after transplantation ( $n = 3$ ).

**Supplementary Figure 5** PML plays a crucial role in LICs. **a-c**, Survival of recipient mice receiving transduced bone marrow cells from  $Pml^{+/+}$  or  $Pml^{-/-}$  mice at the 1<sup>st</sup> (**a**) and the 2<sup>nd</sup> round of BMT (**c**). WBC counts at the indicated time in the 1<sup>st</sup> round of BMT are shown (**b**). **d**, Splenomegaly in recipients transplanted with p210<sup>bcr-abl</sup> overexpressing  $Pml^{+/+}$  bone marrow cells in the 3<sup>rd</sup> round of BMT. Ratio of spleen weight to that of recipient transplanted with MSCV-ires-GFP overexpressing WT KSL cells are shown ( $n = 3$ ). **e**, Survival of recipient mice receiving WT BM cells infected with p210<sup>bcr-abl</sup> or empty vector in the 4<sup>th</sup> round of BMT.  $P$ -value was generated by a log-rank test.

**Supplementary Figure 6** As<sub>2</sub>O<sub>3</sub> reversibly decreased levels of PML expression *in vivo*. Mice were treated with As<sub>2</sub>O<sub>3</sub> from 8- to 12-week-old (4W) and then observed from 12 to

16 weeks without treatment (8W; After Break). Pml expression in CD34<sup>neg</sup> KSL cells was analyzed by immunofluorescence. Representative Pml staining is shown (left). The number of PML NBs in 150 randomly selected cells was counted ( $n = 3$ ). The staining of Pml and the number of NBs in  $Pml^{-/-}$  CD34<sup>neg</sup>KSL cells are also demonstrated as negative control.

**Supplementary Figure 7** Rapamycin (RAPA) rescues defects of *Pml*-deficient HSCs and LICs. **a**, CD34<sup>neg</sup> KSL cells from 8-week-old  $Pml^{+/+}$  and  $Pml^{-/-}$  mouse were directly flow-sorted into protein sample buffer and immunoblotted with anti-P-S6, S6, Pml and actin antibody. Representative blots are shown in the left panel. Graph represents P-S6 levels normalized for total protein levels and  $\beta$ -actin. Asterisks indicate Pml isoforms. **b**, Treatment with rapamycin (RAPA) *in vitro* restores colony forming capacity of  $Pml^{-/-}$  KSL cells.  $Pml^{+/+}$  and  $Pml^{-/-}$  KSL cells were cultured with stromal cells and rapamycin for the indicated number of weeks (W) and tested for colony formation. Data shown are the mean numbers  $\pm$  s.d. of colonies formed ( $n = 3$ ). **c**, Rapamycin treatment rescues defects in maintenance of quiescence in  $Pml^{-/-}$  HSCs. Flow cytometric analysis of bone marrow cells from wild-type or  $Pml^{-/-}$  mice treated with rapamycin from 4- to 8-week-old. Cell cycle status of HSCs was analyzed by flow cytometry. Data are mean percentages  $\pm$  s.d. of Pyronin Y negative cells in KSL cells at 8 weeks of age ( $n = 3$ ). **d**,  $Pml^{+/+}$  or  $Pml^{-/-}$  mice were treated with RAPA from 4- to 8-week-old and number of CD34<sup>neg</sup>KSL cells was measured. Results are mean absolute numbers  $\pm$  s.d. of CD34<sup>neg</sup>KSL cells. **e**, Rapamycin restores the long-term reconstitution potential of  $Pml^{-/-}$  HSCs. Recipient mice were transplanted with  $1.5 \times 10^3$  KSL cells from  $Pml^{+/+}$  or  $Pml^{-/-}$  mice plus  $4 \times 10^5$  competitor cells in a competition assay. Some recipient mice were treated with rapamycin for 16 weeks.

Results are mean percentages  $\pm$  s.d. of donor-derived cells at the indicated number of weeks after BMT ( $n = 3$ ). **f**, Restored haematopoietic reconstitution *in vivo* after long-term treatment with RAPA. KSL cells were isolated from 8-week-old  $Pml^{+/+}$  and  $Pml^{-/-}$  mice and transplanted to irradiated recipient mice. Some recipient mice were treated with rapamycin for 4 months after transplantation. Results are mean percentages  $\pm$  s.d. of donor-derived cells 4 months after BMT ( $n = 3$ ). **g**, Administration of rapamycin rescues maintenance defect of  $Pml$ -deficient LICs. Transduced KSL cells cultured on stromal cells and treated with rapamycin for the indicated number of weeks (W) were analyzed for colony formation ( $n = 3$ ). **h**, Mice transplanted with transduced bone marrow cells from  $Pml^{+/+}$  or  $Pml^{-/-}$  mice were treated with rapamycin for 2 weeks. Survival of recipient mice at the 1<sup>st</sup> round of BMT is shown. **i**, Treatment with rapamycin restores the potential to develop CML-like disease of  $Pml^{-/-}$  LICs. Transduced  $Pml^{+/+}$  and  $Pml^{-/-}$  bone marrow cells were transplanted to recipient mice. Some recipient mice were treated with rapamycin for 2 weeks during the 1<sup>st</sup> and 2<sup>nd</sup> round of BMT. In the third round of BMT, rapamycin treatment was discontinued. Survival of recipient mice in the third round of BMT is demonstrated. **j**, WBC counts at the indicated time in the 3<sup>rd</sup> round of BMT are demonstrated.

**Supplementary Figure 8**  $As_2O_3$  treatment does not induce apoptosis in either LICs or HSCs. Bone marrow cells infected with p210<sup>bcr/abl</sup> or empty vector (MSCV-ires-GFP) were co-cultured with stromal cells for 2 weeks. Apoptosis in KSL cells was analyzed by flow cytometry ( $n = 3$ ). As a positive control, cells were treated with 10 $\mu$ M etoposide for two days and lineage positive cells were stained with Annexin V.

**Supplementary Figure 9** Co-treatment with As<sub>2</sub>O<sub>3</sub> and Ara-C induces apoptosis in LICs. **a**, Transduced *Pml*<sup>+/+</sup> KSL cells were cultured on stromal cells with As<sub>2</sub>O<sub>3</sub> for 9 days. Then cells were co-treated with As<sub>2</sub>O<sub>3</sub> and Ara-C for 5 days. KSL cells were stained with Annexin V and analyzed by flow cytometry. Results are percentages ± s.d. of Annexin V positive cells (*n* = 3). **b**, Combined therapy with As<sub>2</sub>O<sub>3</sub> and Ara-C induces remarkable survival advantage and complete cure in more than half of the recipient mice. Transduced BM cells (1.5x10<sup>4</sup> cells) co-cultured with stromal cells were treated with As<sub>2</sub>O<sub>3</sub> for two weeks and with Ara-C for 5 days. CD45 positive cells were sorted and transplanted into recipient mice with competitor cells (4x10<sup>5</sup> MNCs). Survival of recipient mice in the 2<sup>nd</sup> round of BMT is shown. *P*-value was generated by a log-rank test.

**Supplementary Figure 10** LICs cycle more than normal HSCs. **a**, Bone marrow cells infected with empty vector (MSCV-ires-GFP) or p210<sup>bcr-abl</sup> were co-cultured with stromal cells for two weeks. KSL cells were stained with Pyronin Y and analyzed by flow cytometry. Mean percentages ± s.d. of Pyronin Y negative cells in KSL cells (*n* = 3) are shown. **b**, *Pml*<sup>+/+</sup> bone marrow cells infected with p210<sup>bcr-abl</sup> or empty vector were transplanted into irradiated recipient mice. Donor-derived KSL cells were stained with Pyronin Y and analyzed by flow cytometry 14 days after BMT. Mean percentages ± s.d. of Pyronin Y negative cells in donor-derived KSL cells is shown (*n* = 3). **c**, LICs are more sensitive to cell cycle entry by As<sub>2</sub>O<sub>3</sub>. KSL cells overexpressing p210<sup>bcr-abl</sup> or empty vector were co-cultured with stromal cells with As<sub>2</sub>O<sub>3</sub> for two weeks. KSL cells were stained with Pyronin Y and analyzed by flow cytometry. Results are mean relative Pyronin Y negative cells in KSL cells treated with As<sub>2</sub>O<sub>3</sub> compared with p210<sup>bcr-abl</sup> or empty vector overexpressing cells without treatment respectively (*n* = 3). **d**, *Pml*<sup>+/+</sup> and *Pml*<sup>-/-</sup> BM cells

overexpressing p210<sup>bcr-abl</sup> or empty vector were transplanted into irradiated recipient mice. Cell cycle status of donor-derived KSL cells was analyzed by Pyronin Y staining 14 days after BMT. Relative percentages of Pyronin Y negative cells in *Pml*<sup>-/-</sup> cells compared with *Pml*<sup>+/+</sup> cells infected with each vector is demonstrated ( $n = 3$ ). **e**, Co-treatment with Ara-C and As<sub>2</sub>O<sub>3</sub> affects LICs more than HSCs. KSL cells overexpressing p210<sup>bcr-abl</sup> or empty vector were co-cultured with stromal cells with As<sub>2</sub>O<sub>3</sub> for two weeks and Ara-C for 5 days. KSL cells were stained with Annexin V and analyzed flow cytometry. Results are percentages  $\pm$  s.d. of Annexin V positive cells in KSL cells ( $n = 3$ ).

**Supplementary Figure 11** **a, b**, Mice transplanted with transduced BM cells are treated with As<sub>2</sub>O<sub>3</sub> for 9 days from the next day of BMT. Then mice were co-treated with As<sub>2</sub>O<sub>3</sub> and Ara-C for 5 days.  $1.5 \times 10^6$  BMMNCs were collected from recipient mice 2 weeks after the first BMT and were transplanted into other recipient mice (second BMT). Third transplantation was also performed in the same manner. Survival of recipient mice in the first (**a**) and the third round (**b**) of BMT is shown. Log rank statistical analysis was performed to obtain  $p$ .

**Supplementary Figure 12** As<sub>2</sub>O<sub>3</sub> treatment induces more cycling in human primary LICs than normal HSCs. **a**, Lin<sup>-</sup>CD34<sup>+</sup>CD38<sup>low/neg</sup> cells from CML-CP patients at diagnosis were sorted and cultured with As<sub>2</sub>O<sub>3</sub> for 3 days. PML expression was analyzed by immunofluorescence. Representative data are shown (left panels). The number of PML NBs in 50 randomly selected cells in each lineage was counted (right panel). **b**, Lin<sup>-</sup>CD34<sup>+</sup>CD38<sup>low/neg</sup> cells from healthy volunteers and CML patients were stained with CFSE and cultured with SCF+TPO+Flt-3L. After three days in culture, fluorescence intensity of

CFSE was analyzed by flow cytometry. Representative CFSE profile is shown. **c**, Single cell sorting of  $\text{Lin}^- \text{CD34}^+ \text{CD38}^{\text{low/neg}} \text{c-Kit}^+$  cells was performed and cells were cultured with SCF+TPO+Flt-3L. Cell division of these cells was monitored daily.

**Supplementary Table 1** Co-treatment with Ara-C and  $\text{As}_2\text{O}_3$  *ex vivo* has the potential of completely eradicating LICs. Transduced BM cells ( $1.5 \times 10^4$  cells) co-cultured with stromal cells were treated with  $\text{As}_2\text{O}_3$  for two weeks and with Ara-C for 5 days. CD45 positive cells were sorted and transplanted into recipient mice with competitor cells ( $4 \times 10^5$  MNCs). Percentage of MRD-detection is shown at the indicated time after the 2<sup>nd</sup> BMT (upper) and at 2 weeks after the 1<sup>st</sup> round BMT (lower).

**Supplementary Table 2** *In vivo* combined Ara-C and  $\text{As}_2\text{O}_3$  therapy completely eradicates LICs. Percentage of MRD-detection is shown at 2 weeks after the 3<sup>rd</sup> BMT (upper) and 2<sup>nd</sup> round BMT (lower).

**Supplementary Table 3, 4** Clinical and immunohistochemical characteristics of CML patients.



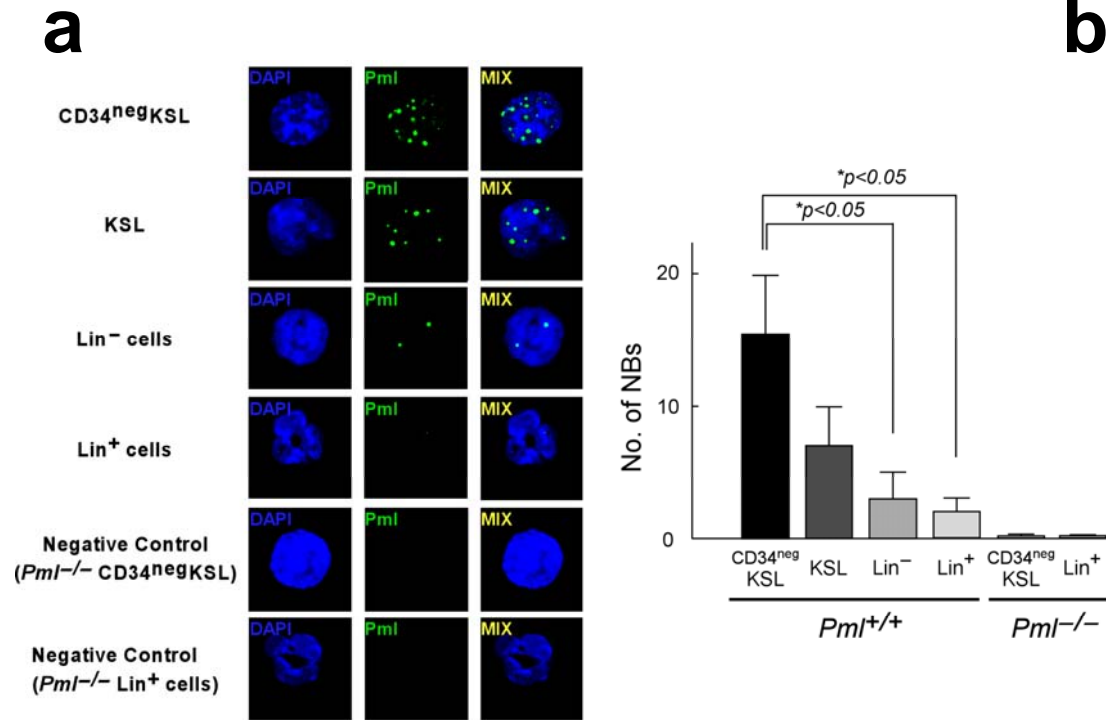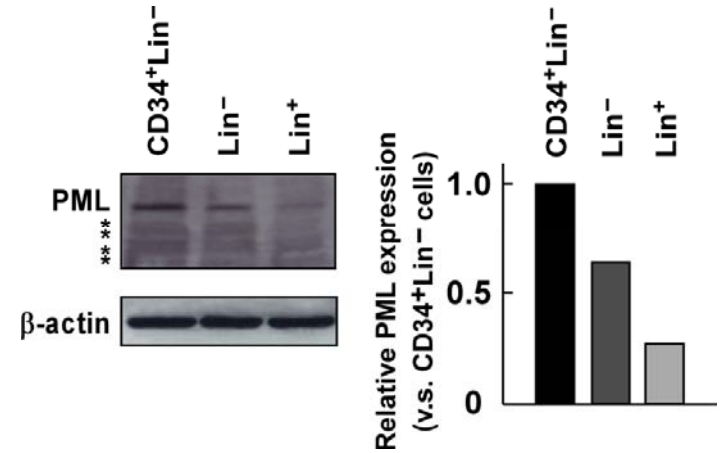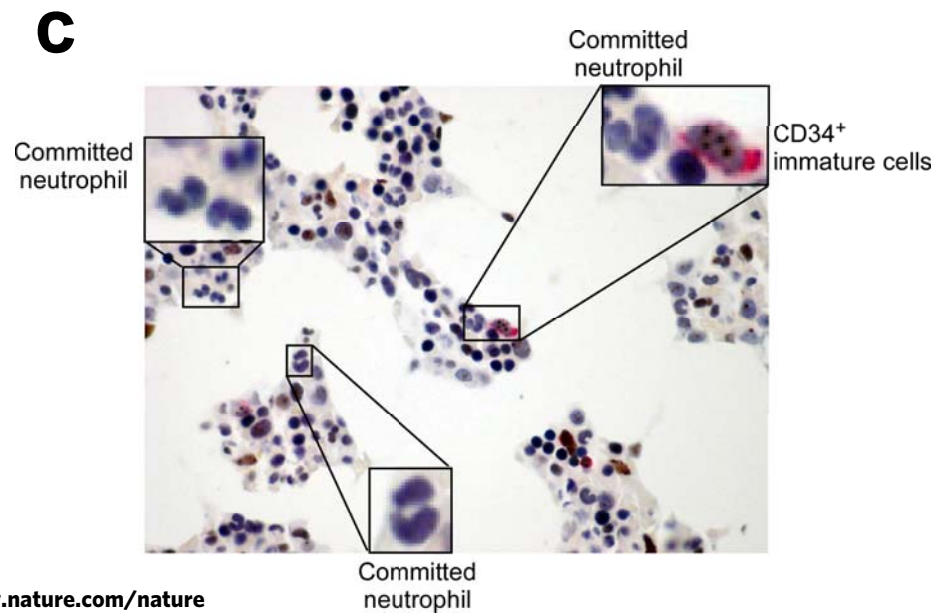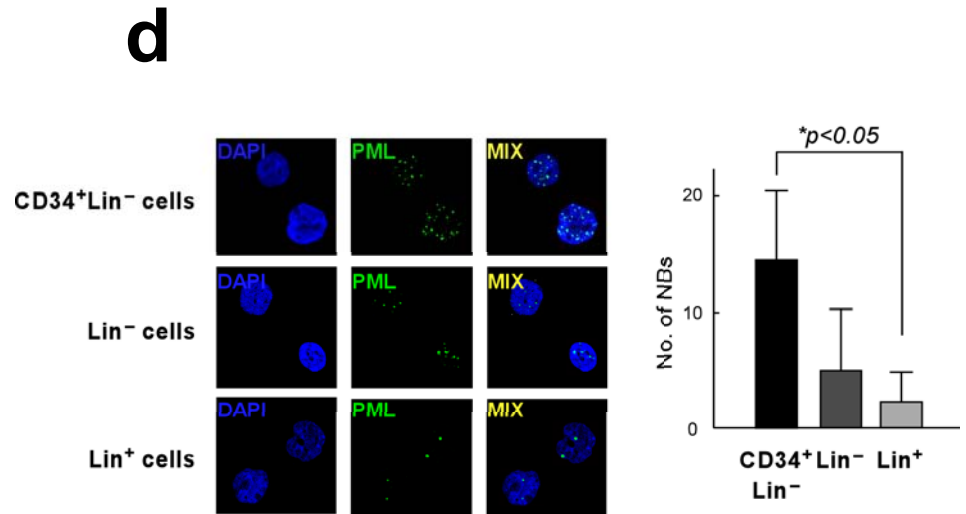

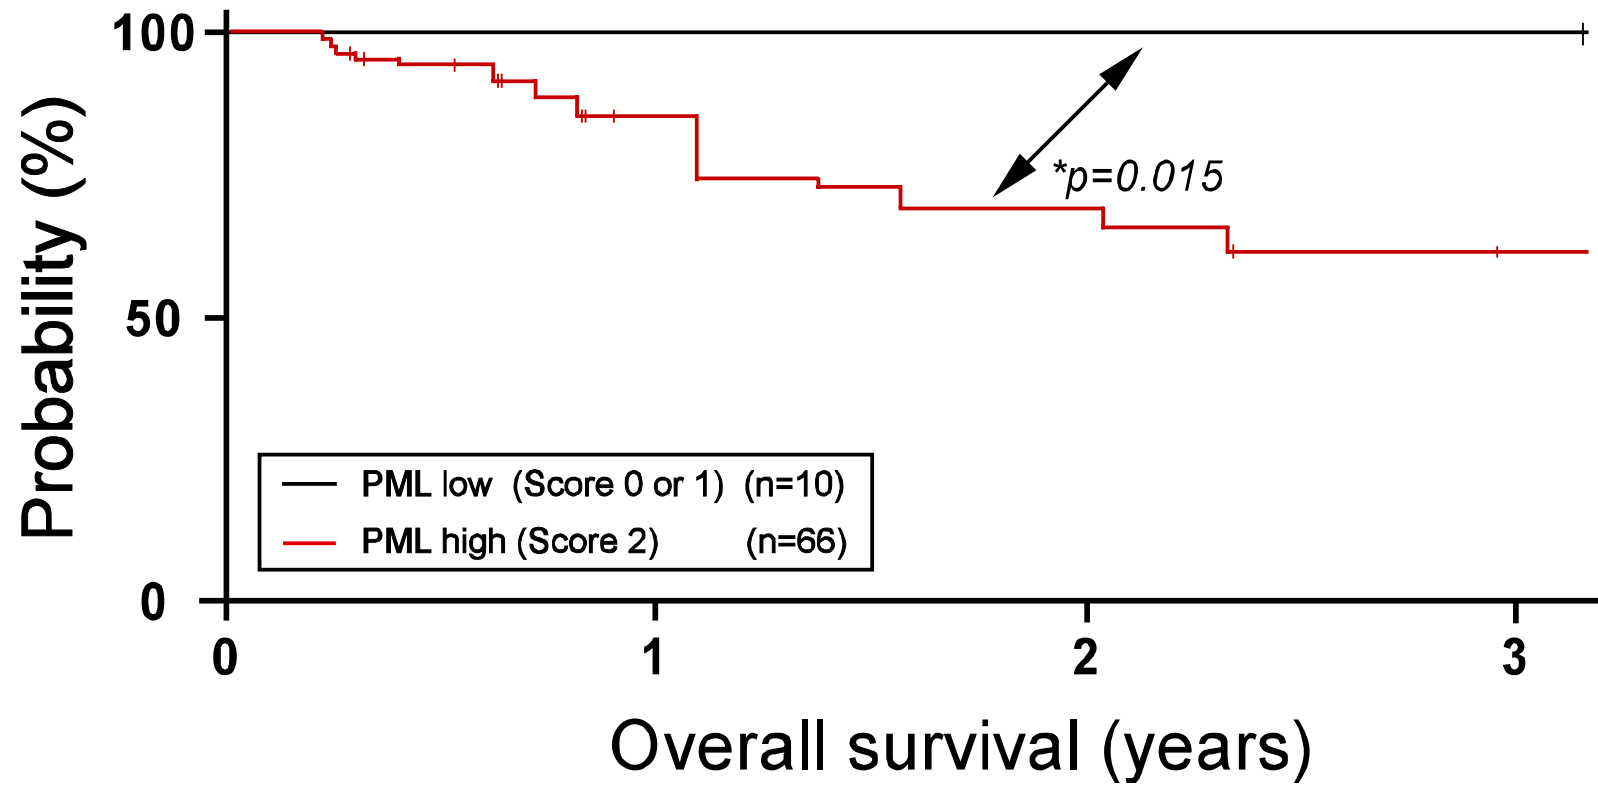

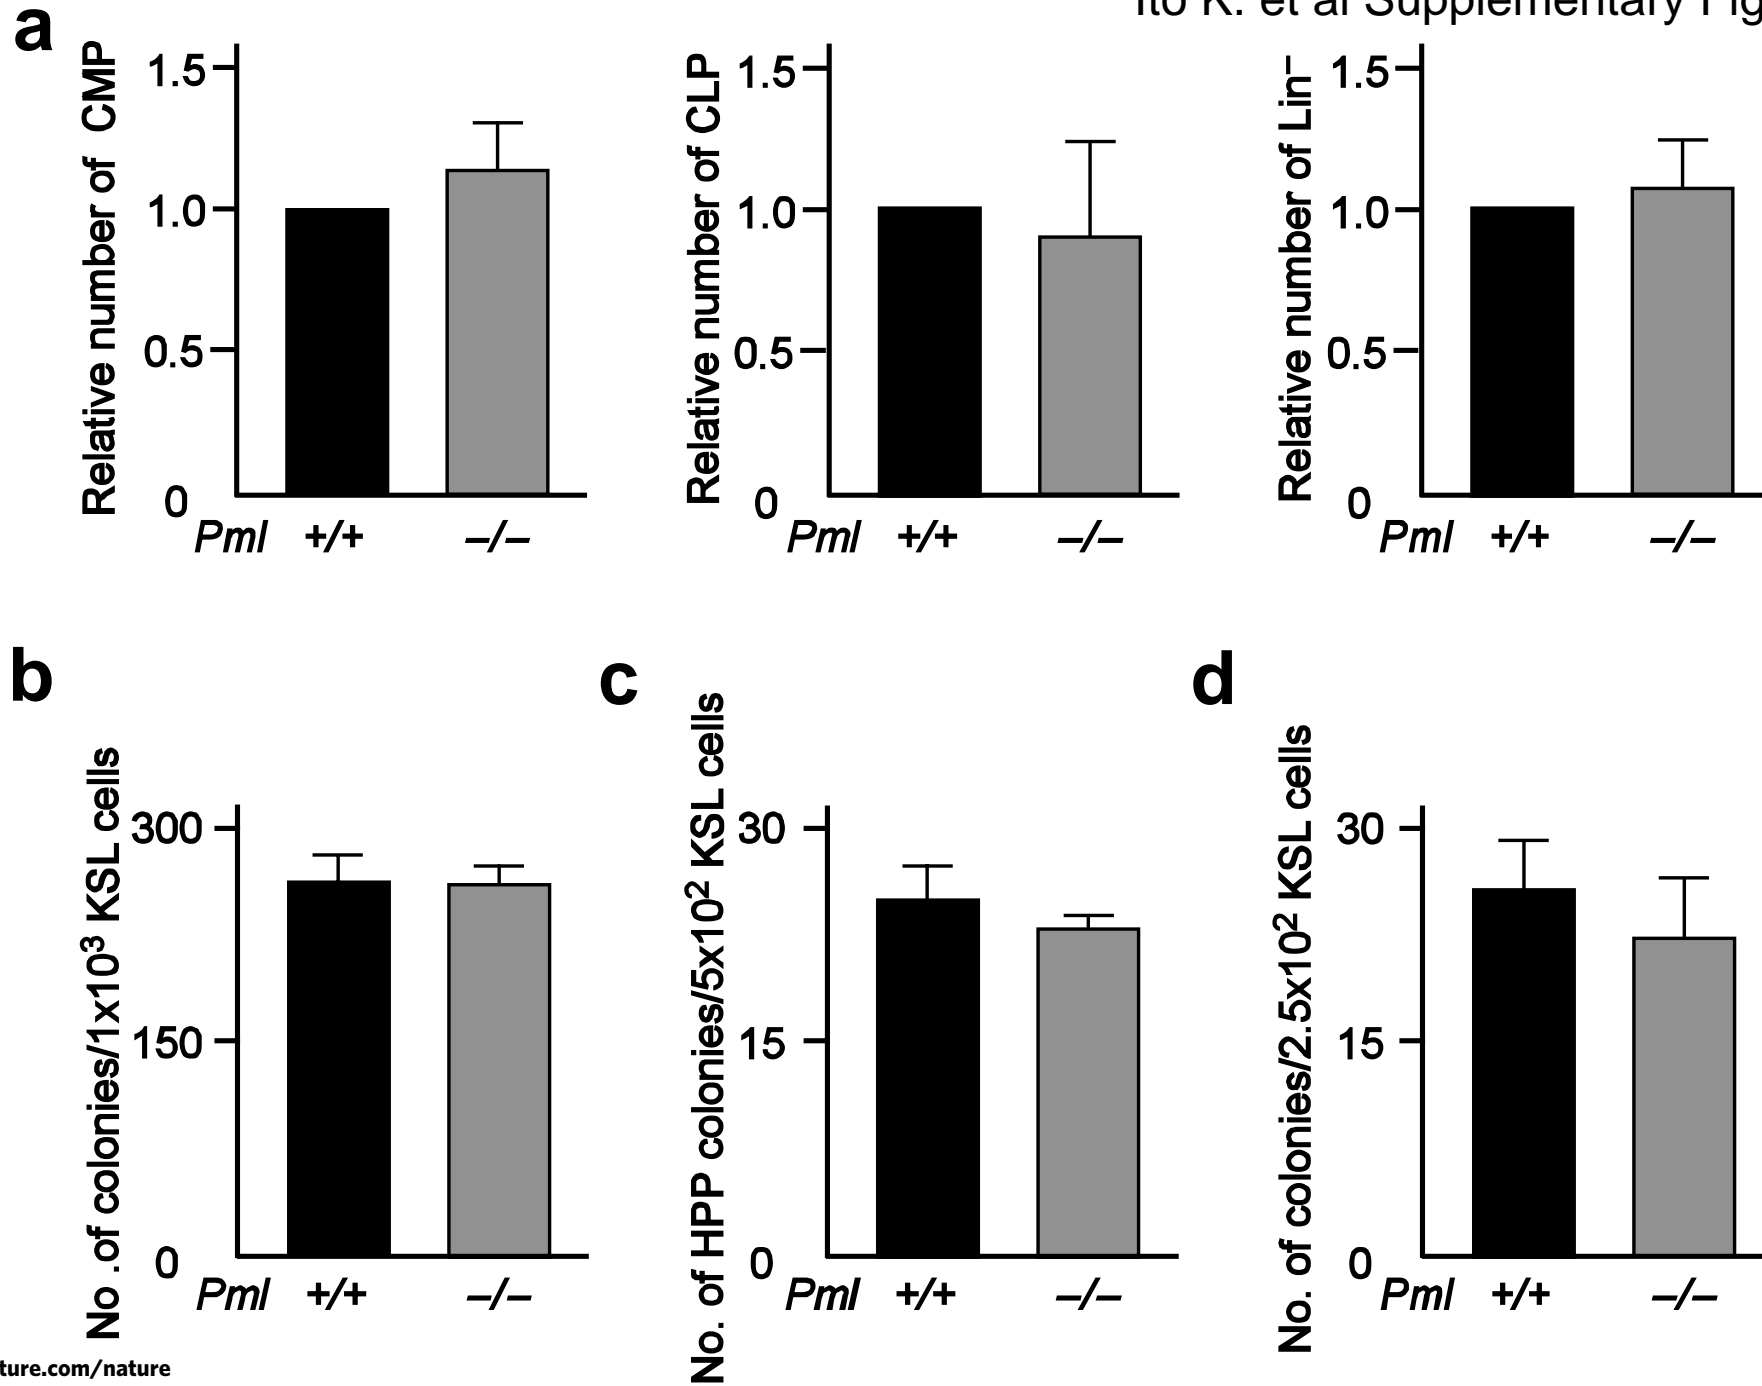

**a**

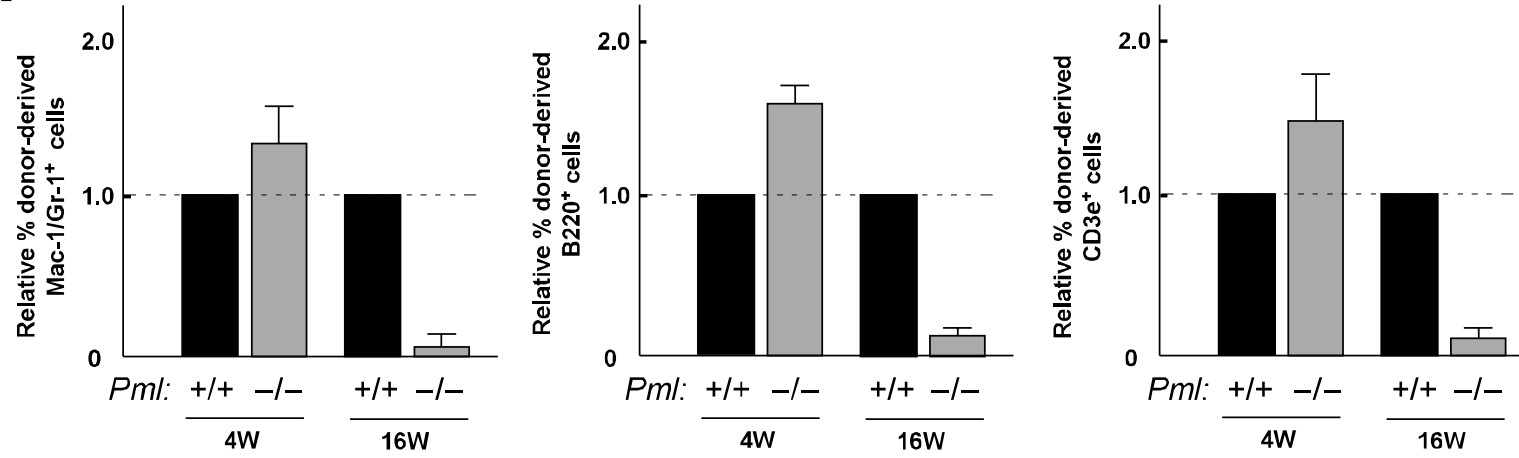

**b**

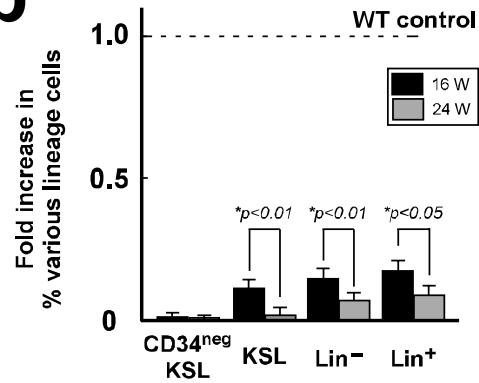

**c**

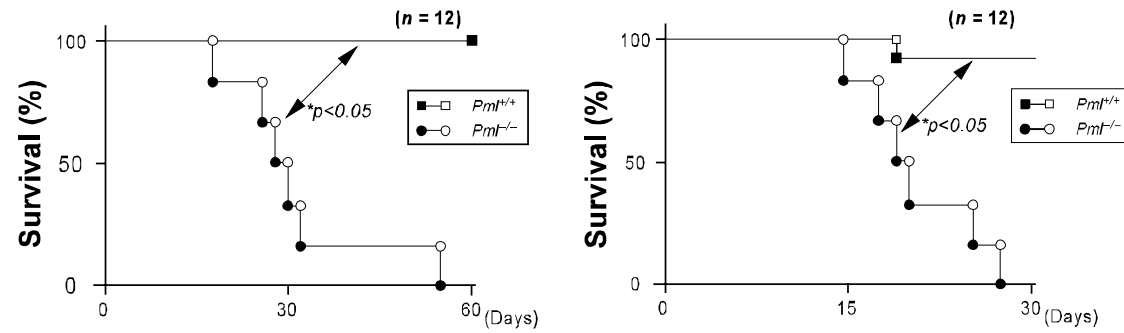

**d**

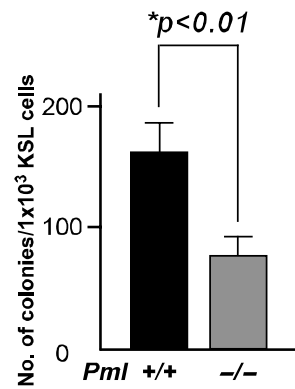

**e**

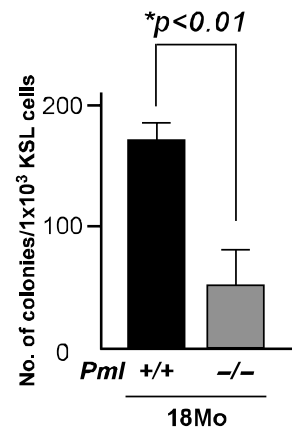

**f**

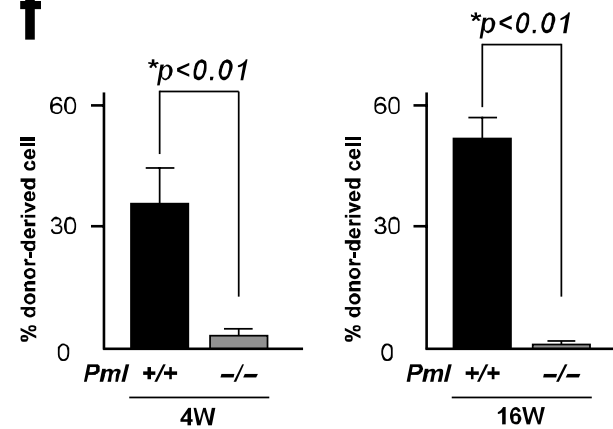

**a**

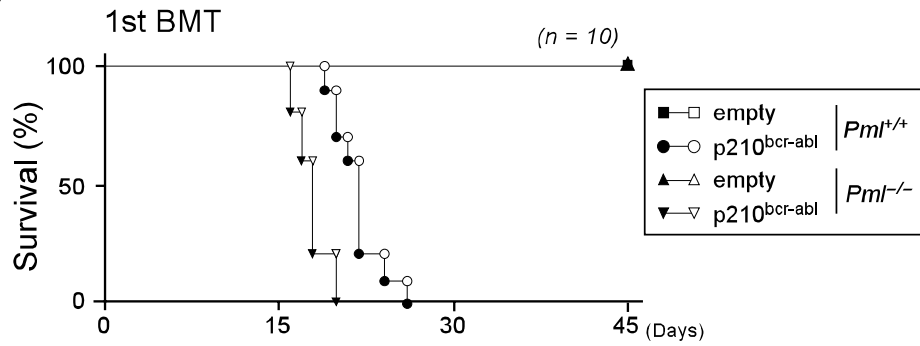

**b**

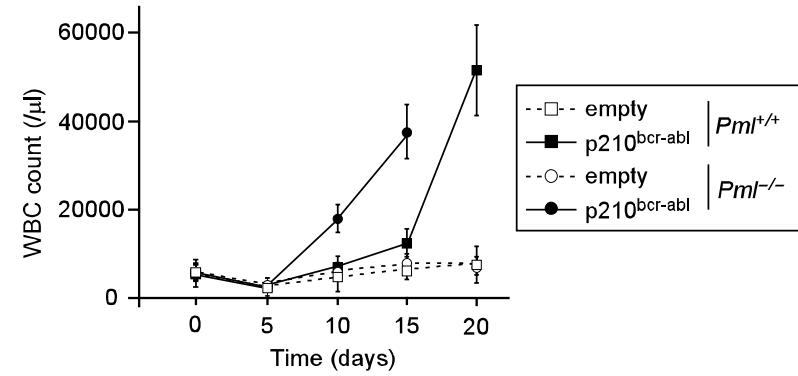

**c**

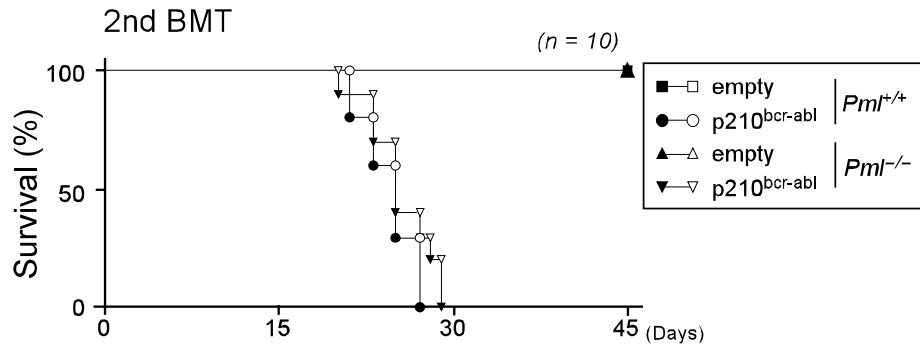

**d**

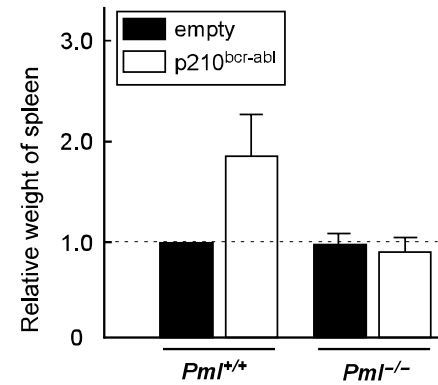

**e**

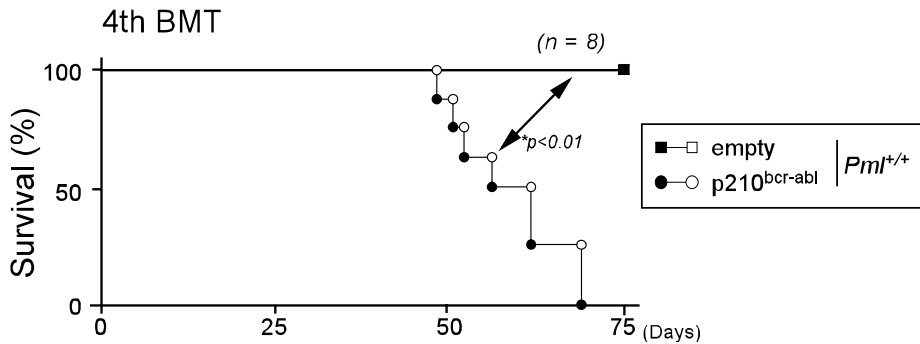

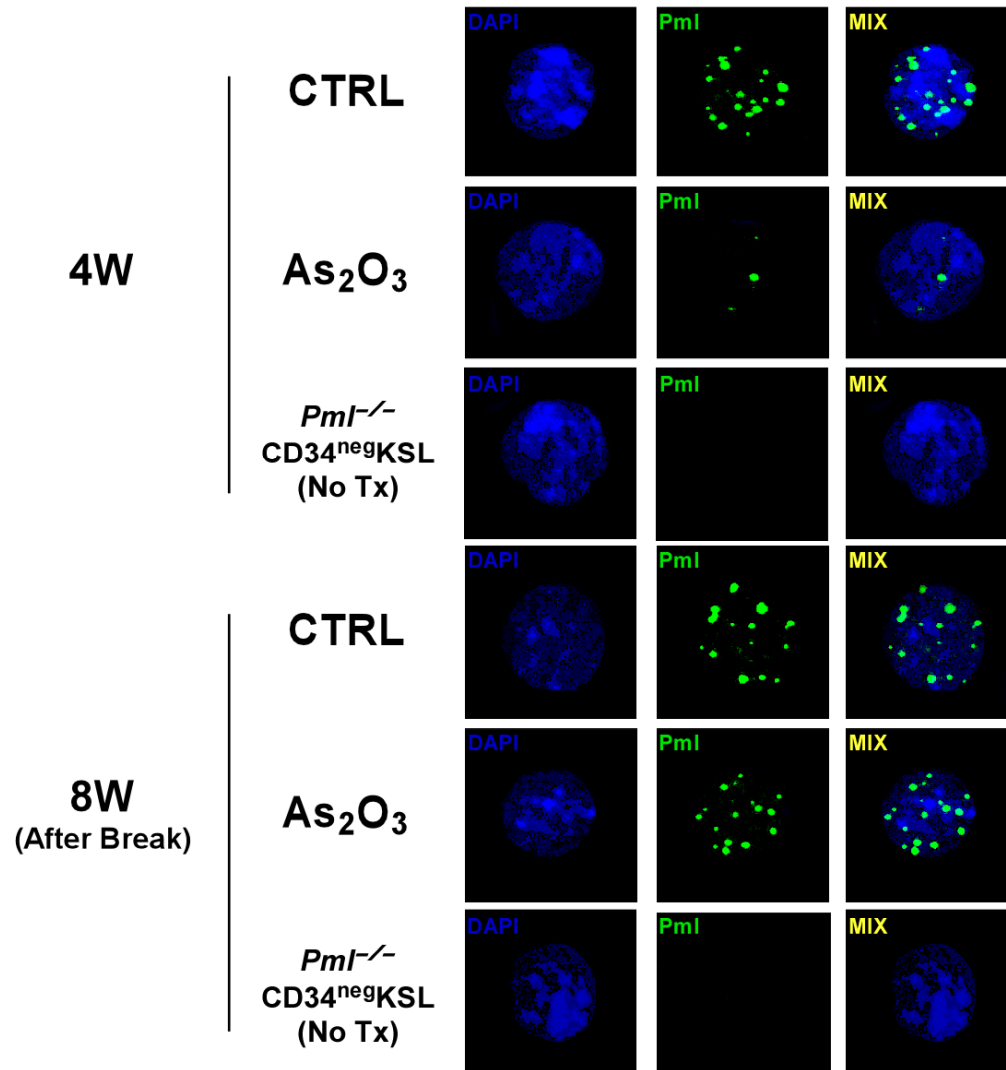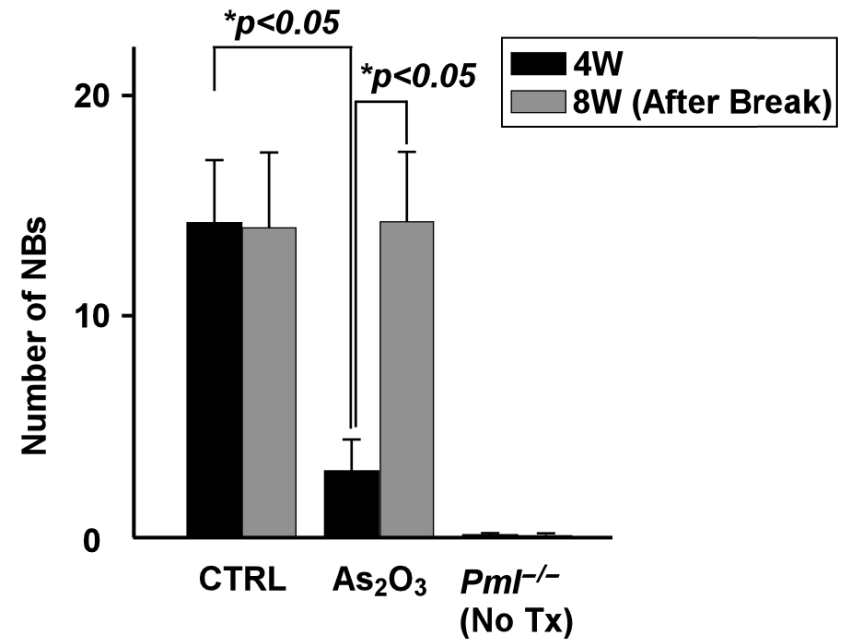

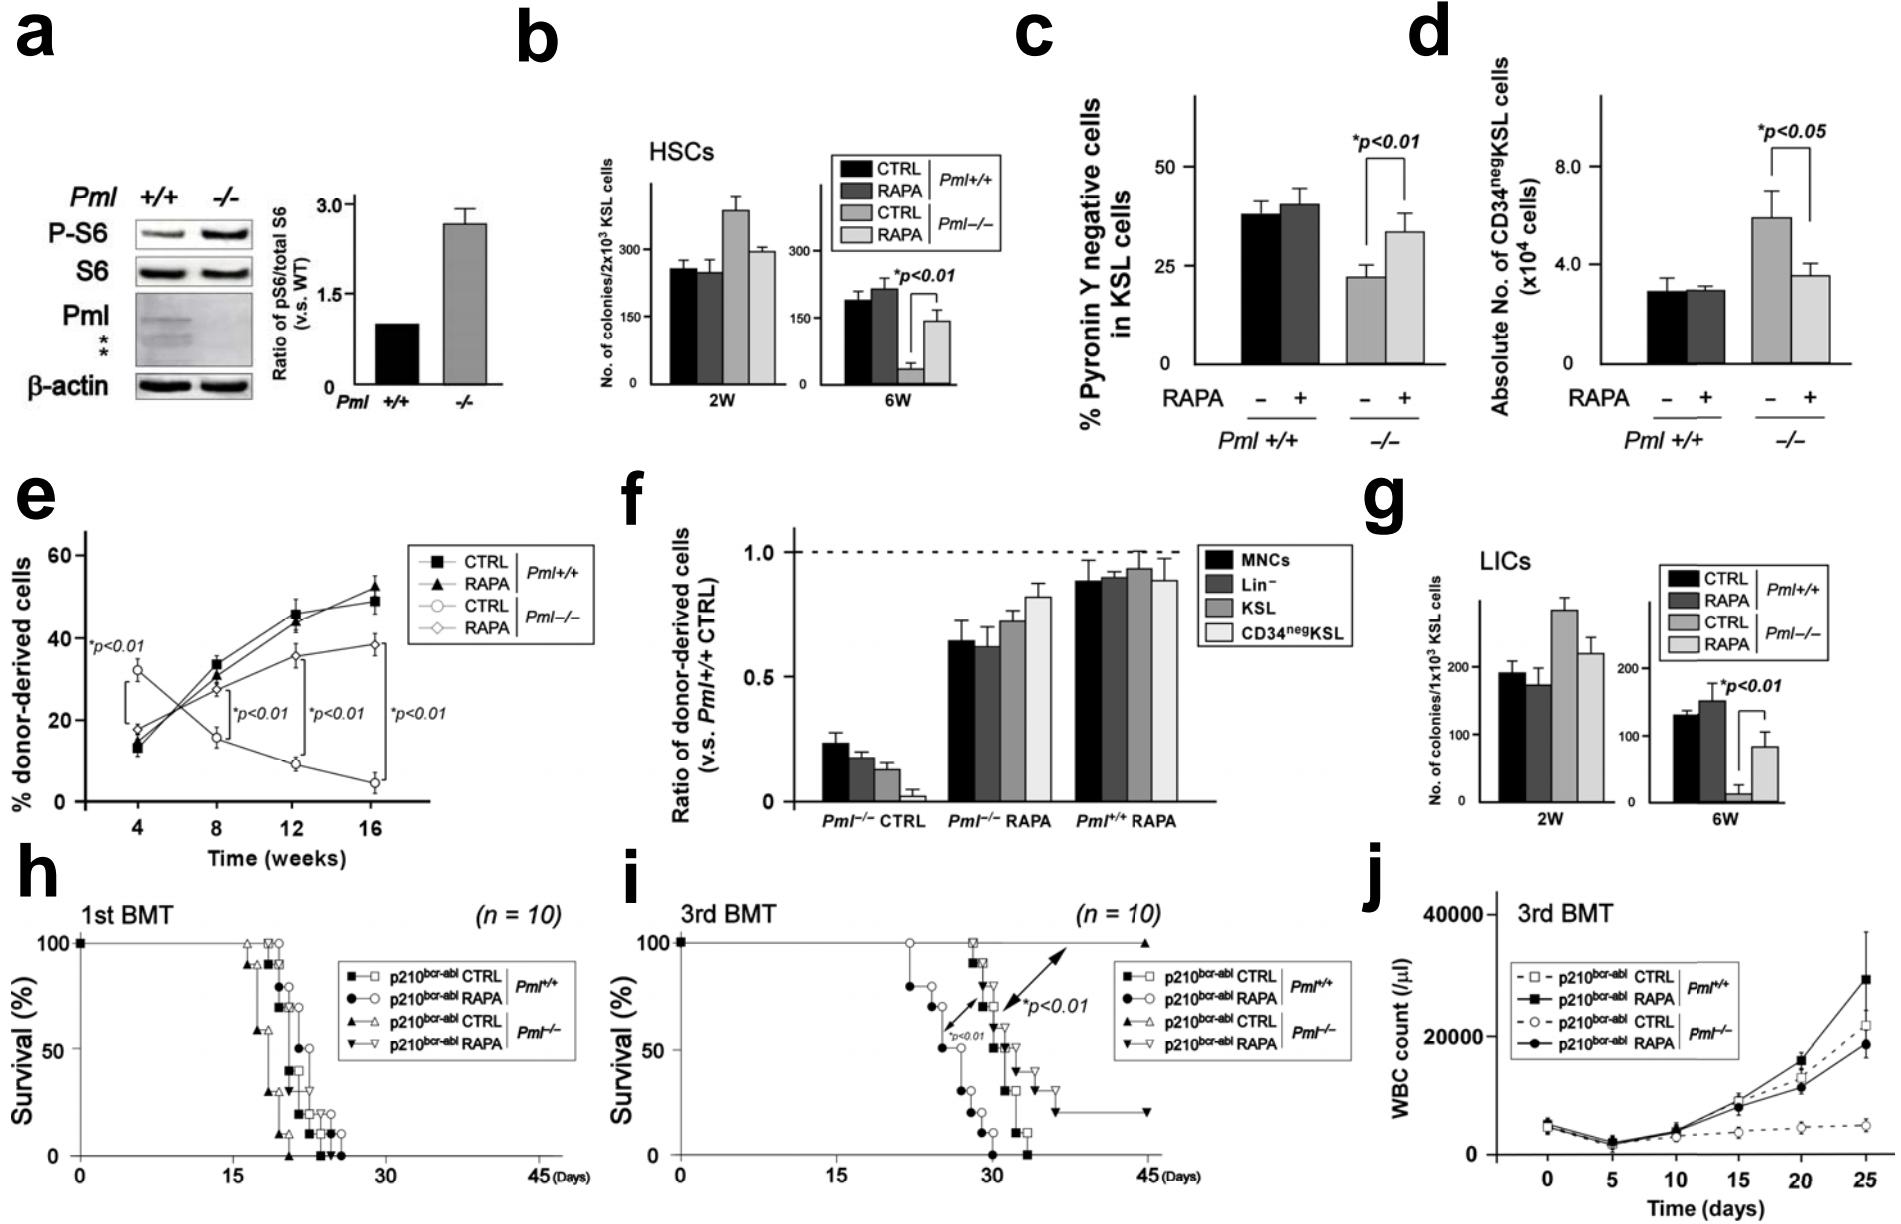

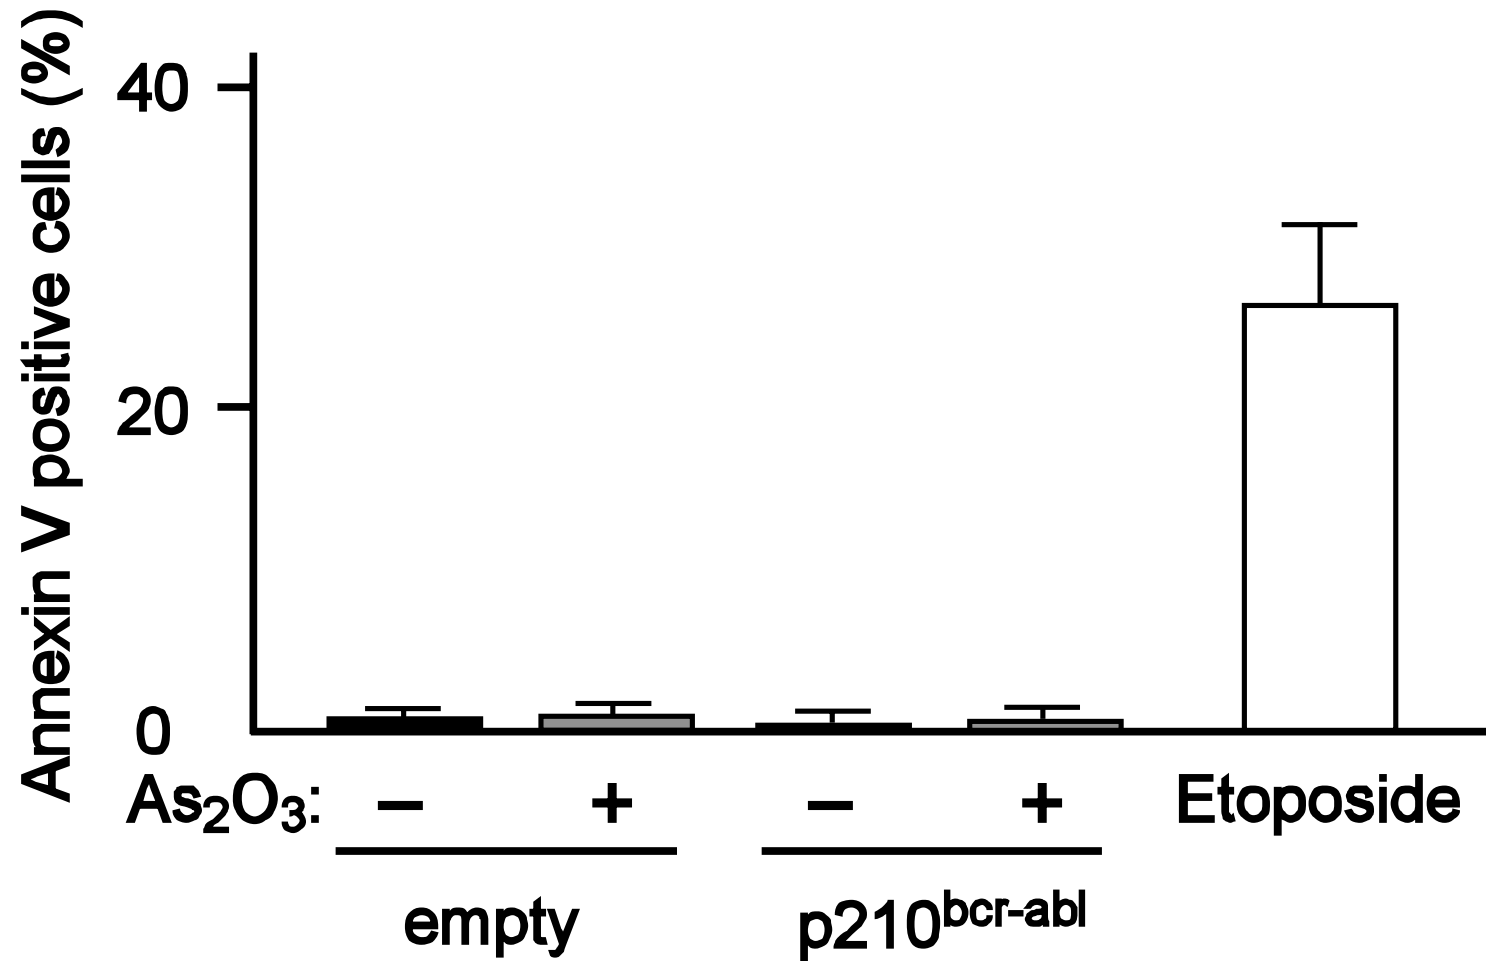



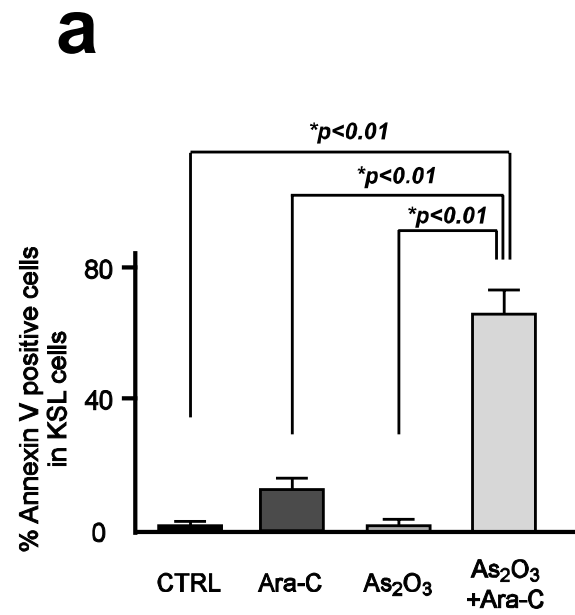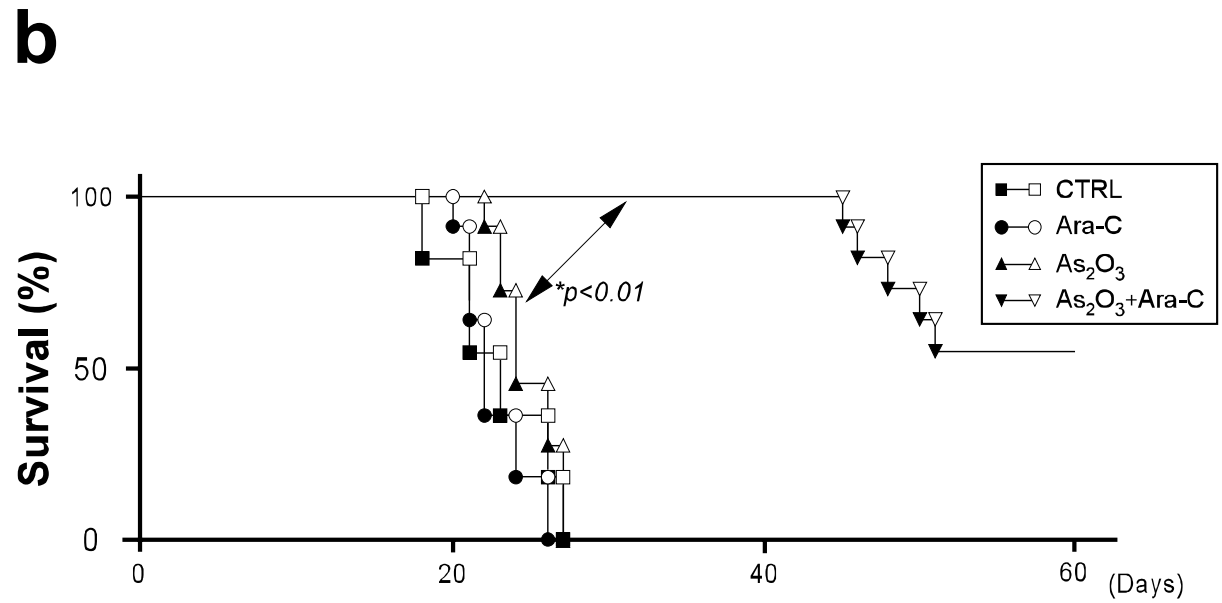

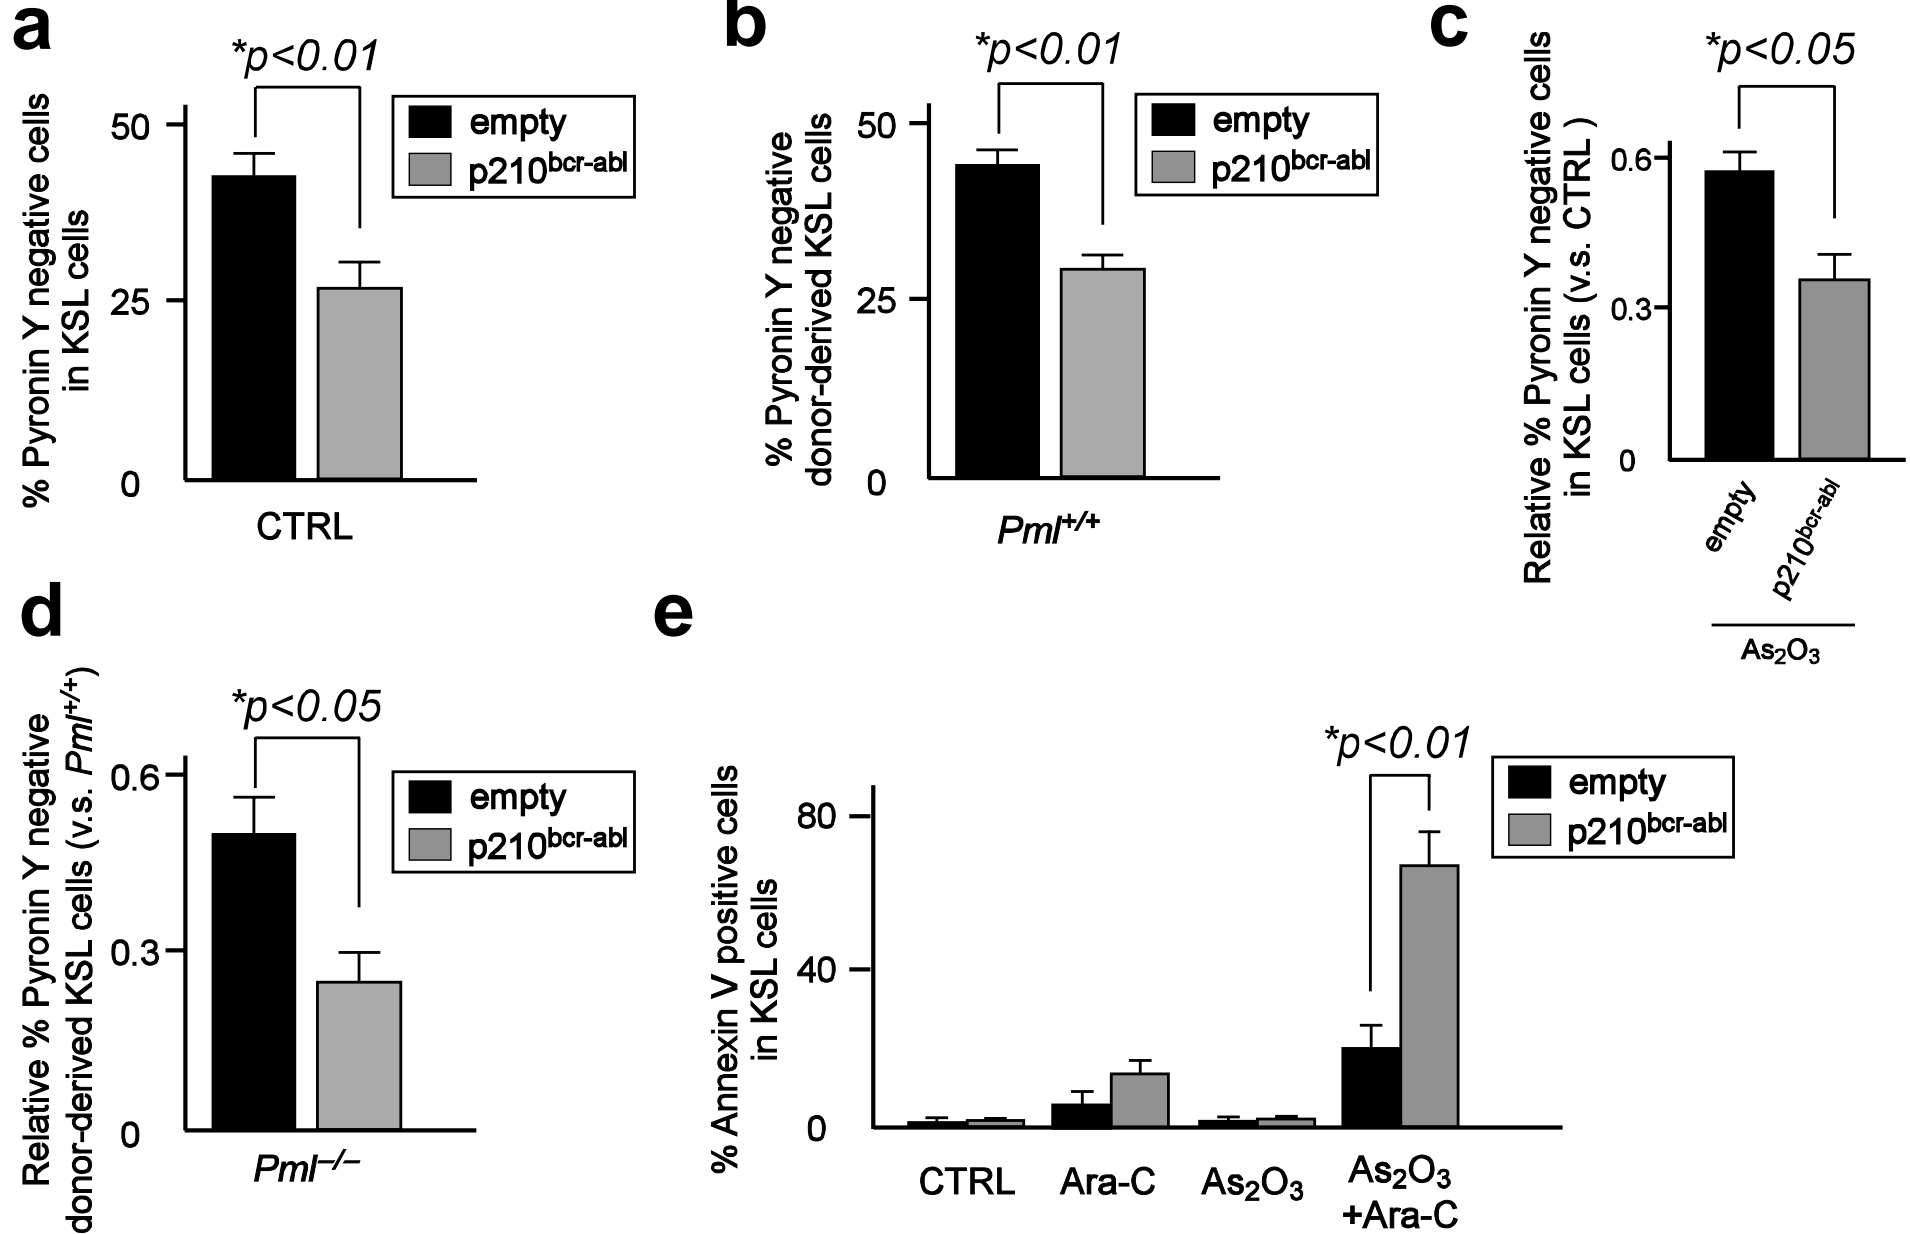

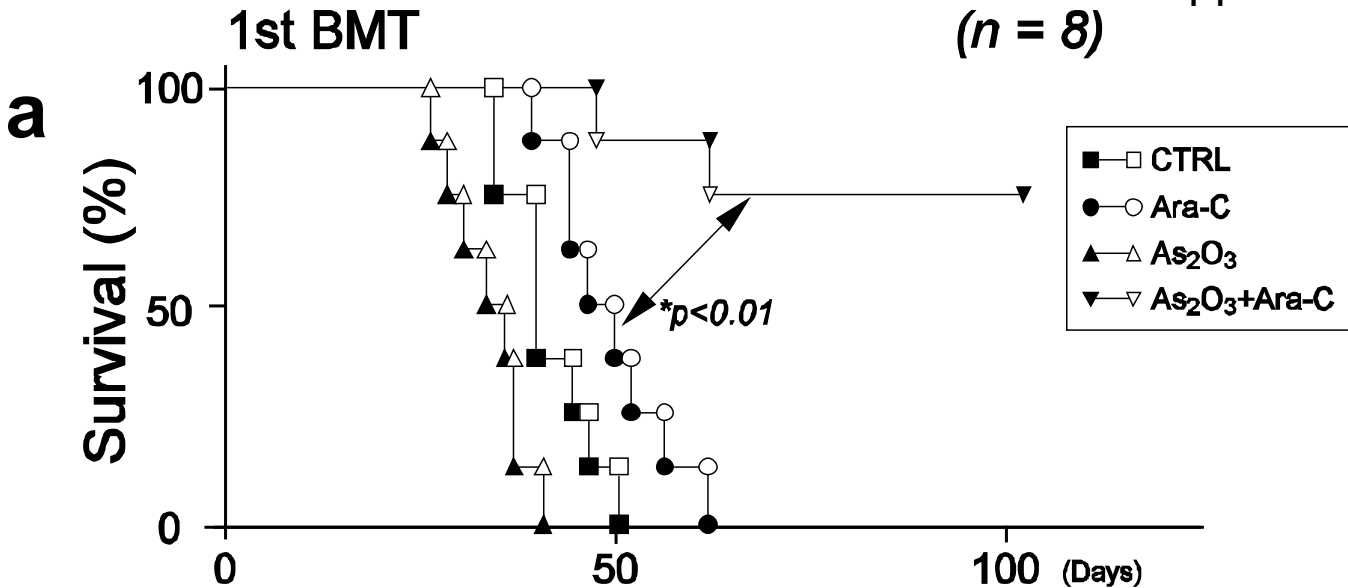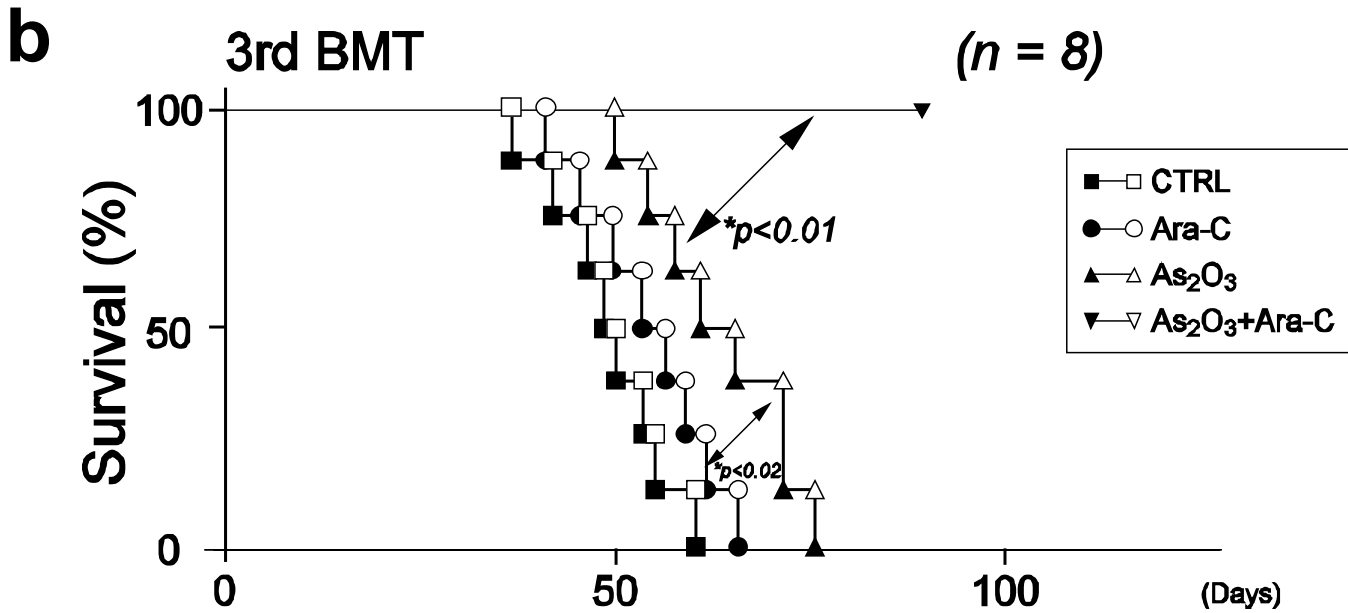

**a**

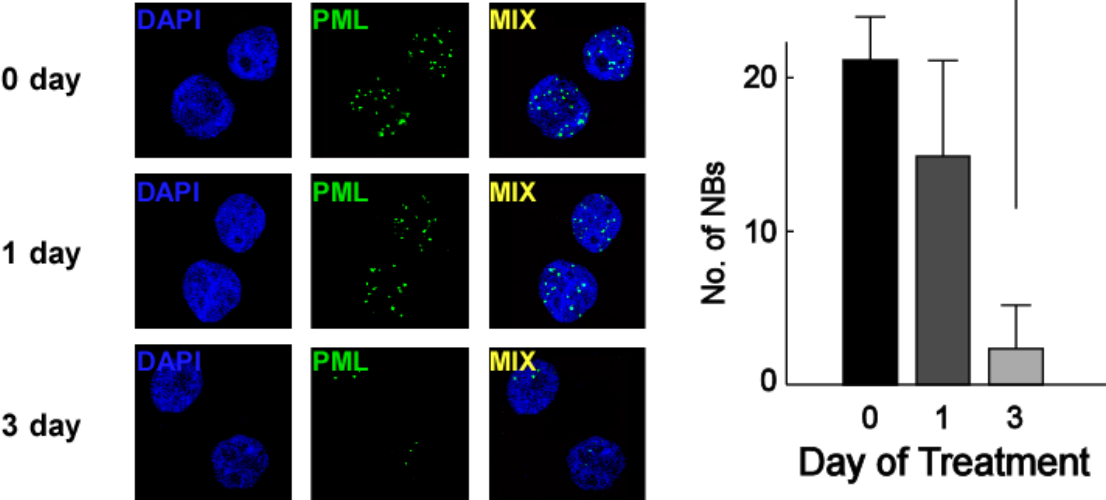

**b**

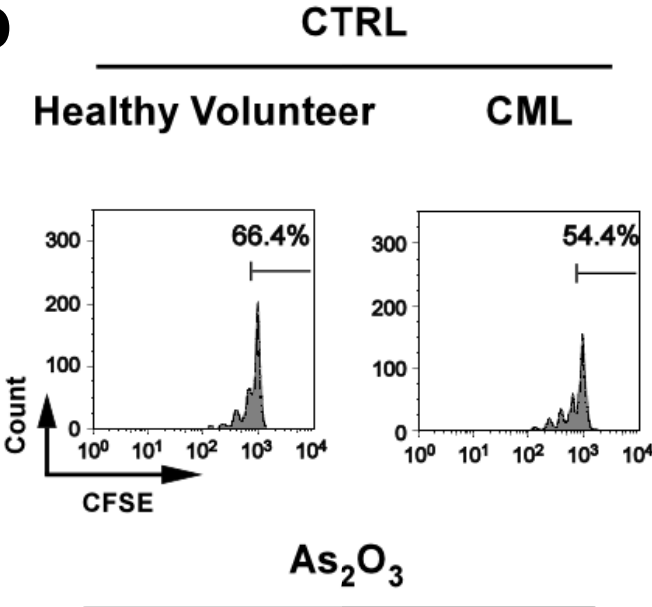

**c**

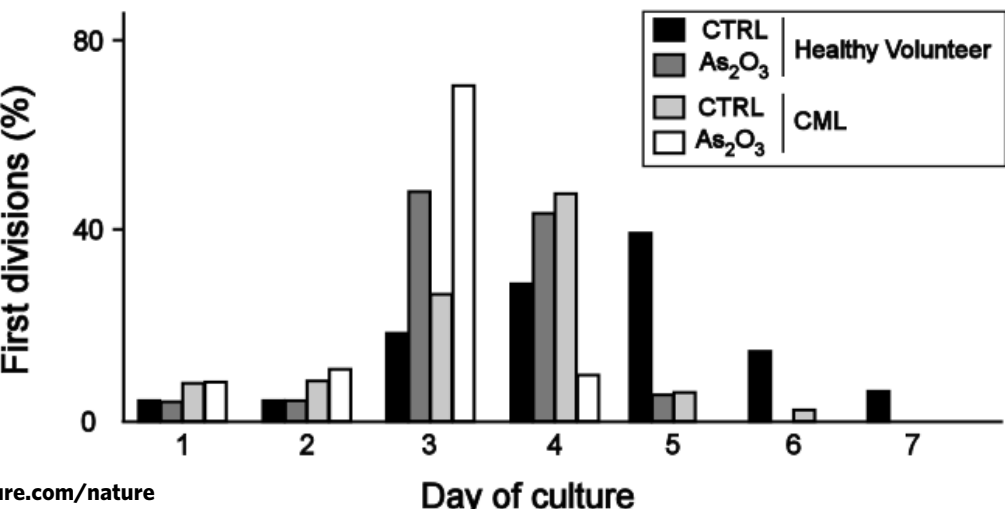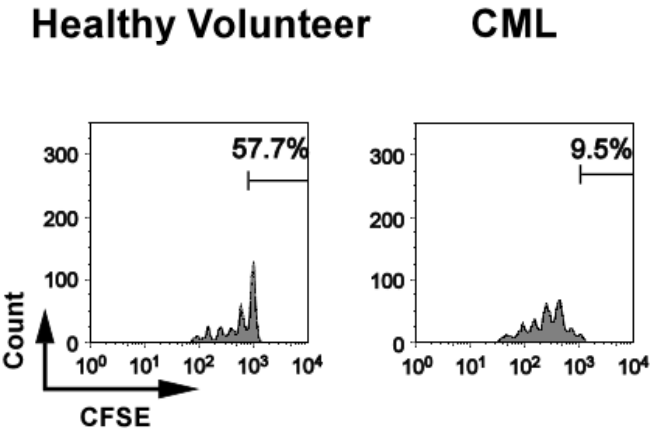

## Supplementary Table 1 Analysis of MRD by nested RT-PCR

| 2nd round of BMT               |               | 14 days       |               |             |             | 60 days |
|--------------------------------|---------------|---------------|---------------|-------------|-------------|---------|
| Ara-C                          | -             | +             | -             | +           | +           |         |
| As <sub>2</sub> O <sub>3</sub> | -             | -             | +             | +           | +           |         |
| MRD-detection<br>by PCR        | 3/3<br>(100%) | 3/3<br>(100%) | 3/3<br>(100%) | 0/3<br>(0%) | 0/6<br>(0%) |         |
| 1st round of BMT               |               | 14 days       |               |             |             |         |
| Ara-C                          | -             | +             | -             | +           |             |         |
| As <sub>2</sub> O <sub>3</sub> | -             | -             | +             | +           |             |         |
| MRD-detection<br>by PCR        | 4/4<br>(100%) | 4/4<br>(100%) | 4/4<br>(100%) | 0/4<br>(0%) |             |         |

## Supplementary Table 2 Analysis of MRD by nested RT-PCR

| 3rd round of BMT               |               | 14 days       |               |             |  |
|--------------------------------|---------------|---------------|---------------|-------------|--|
| Ara-C                          | -             | +             | -             | +           |  |
| As <sub>2</sub> O <sub>3</sub> | -             | -             | +             | +           |  |
| MRD-detection<br>by PCR        | 3/3<br>(100%) | 3/3<br>(100%) | 3/3<br>(100%) | 0/3<br>(0%) |  |
| 2nd round of BMT               |               | 14 days       |               |             |  |
| Ara-C                          | -             | +             | -             | +           |  |
| As <sub>2</sub> O <sub>3</sub> | -             | -             | +             | +           |  |
| MRD-detection<br>by PCR        | 4/4<br>(100%) | 4/4<br>(100%) | 4/4<br>(100%) | 0/4<br>(0%) |  |

## Supplementary Table 3 Clinical and immunohistochemical characteristics of CML patients

| Patient # | Phase           | Age | Gender | % Blasts | PML Score | Cytogenesis at diagnosis                                          | Therapy               | Cytogenetic response status<br>(Interval since diagnosis - months) | Molecular response status<br>(Interval since diagnosis - months) |
|-----------|-----------------|-----|--------|----------|-----------|-------------------------------------------------------------------|-----------------------|--------------------------------------------------------------------|------------------------------------------------------------------|
| 1         | CP <sup>a</sup> | 30  | M      | 5        | 2         | Ph1 Chr <sup>b</sup> 100% interphase cells karyotype              | BMT                   | No                                                                 | No                                                               |
| 2         | CP              | 64  | F      | 2        | 2         | Ph1-Chr present (100%)                                            | Hydroxyurea, Gleevec  | CCyR <sup>c</sup> (3 Mo)                                           | No                                                               |
| 3         | CP              | 61  | M      | 3        | 2         | Ph1-Chr present (100%)                                            | Gleevec               | No                                                                 | No                                                               |
| 4         | CP              | 54  | M      | 6        | 1         | Ph1 chromosome present (72%)                                      | Hydroxyurea, Gleevec  | CCyR (3 Mo)                                                        | CMR <sup>d</sup> (9Mo)                                           |
| 5         | CP              | 64  | F      | 3        | 2         | Ph1-Chr present (100%)                                            | IFN, Ara-c            | CCyR (4 Mo)                                                        | No                                                               |
| 6         | CP              | 14  | M      | 4        | 2         | Ph1-Chr present (100%)                                            | Gleevec               | No                                                                 | No                                                               |
| 7         | CP              | 39  | F      | 1        | 2         | Ph1-Chr present (99.8%)                                           | Gleevec               | CCyR (4 Mo)                                                        | No                                                               |
| 8         | CP              | 12  | M      | 2        | 2         | Ph1-Chr present (100%)                                            | Hydroxyurea, IFN, BMT | No                                                                 | No                                                               |
| 9         | CP              | 39  | F      | 1        | 2         | Ph1-Chr present (100%)                                            | Gleevec               | CCyR (8 Mo)                                                        | No                                                               |
| 10        | CP              | 48  | M      | 2        | 2         | Ph1 chromosome present (100%)                                     | Hydroxyurea, IFN      | CCyR (10 Mo)                                                       | No                                                               |
| 11        | CP              | 45  | F      | 1        | 2         | Ph1 chromosome present (41%)                                      | Gleevec               | CCyR (3 Mo)                                                        | No                                                               |
| 12        | CP              | 38  | M      | 4        | 2         | t(9;22)(q34;q11.2); trisomy 8, extra Ph1                          | Gleevec               | No                                                                 | No                                                               |
| 13        | CP              | 46  | F      | 2        | 2         | Ph1-Chr present (100%)                                            | Gleevec               | No                                                                 | No                                                               |
| 14        | CP              | 33  | F      | 2        | 2         | t(9;22)(q34;q11.2) with variant translocation                     | Hydroxyurea, Gleevec  | CCyR (3 Mo)                                                        | CMR (25Mo)                                                       |
| 15        | CP              | 41  | M      | 2        | 2         | Ph1-Chr present (100%)                                            | Gleevec               | CCyR (7 Mo)                                                        | No                                                               |
| 16        | CP              | 32  | F      | 2        | 2         | Ph1-Chr present (100%)                                            | Gleevec               | No                                                                 | No                                                               |
| 17        | CP              | 73  | M      | 2        | 2         | Ph1-Chr present (96%)                                             | Gleevec               | CCyR (7 Mo)                                                        | No                                                               |
| 18        | CP              | 47  | F      | 3        | 2         | Ph1-Chr present (96%)                                             | Gleevec               | No                                                                 | No                                                               |
| 19        | CP              | 49  | M      | 6        | 2         | Ph1 Chr 98.4% interphase cells karyotype, extra copy Ph1-Chr 1.4% | Gleevec               | CCyR (3 Mo)                                                        | No                                                               |
| 20        | CP              | 54  | M      | 1        | 1         | Ph1-Chr present (96%)                                             | Gleevec               | CCyR (3 Mo)                                                        | CMR (8Mo)                                                        |
| 21        | CP              | 33  | F      | 6        | 2         | Ph1-Chr present (96%)                                             | Gleevec, PBSCT        | CCyR (10 Mo)                                                       | No                                                               |
| 22        | CP              | 37  | M      | 2        | 2         | Ph1-Chr present (100%)                                            | Gleevec               | No                                                                 | No                                                               |
| 23        | CP              | 73  | M      | 1        | 2         | Ph1 Chr 59% interphase cells karyotype, FISH 61% interphase cells | Gleevec               | CCyR (10 Mo)                                                       | CMR (13 Mo)                                                      |
| 24        | CP              | 40  | F      | 3        | 2         | Ph1-Chr present (41.8%)                                           | Gleevec               | No                                                                 | No                                                               |
| 25        | CP              | 60  | M      | 1        | 2         | Ph1+ karyotype, FISH 100% interphase cells                        | Gleevec               | No                                                                 | No                                                               |
| 26        | CP              | 52  | F      | 2        | 2         | Ph1-Chr present (100%)                                            | Gleevec               | CCyR (6 Mo)                                                        | No                                                               |
| 27        | CP              | 46  | F      | 1        | 2         | Ph1+ karyotype, FISH 100% interphase cells                        | Gleevec               | CCyR (6 Mo)                                                        | No                                                               |
| 28        | CP              | 55  | F      | 2        | 2         | Ph1+ karyotype, FISH 24.3% interphase cells                       | Gleevec               | CCyR (6 Mo)                                                        | No                                                               |
| 29        | CP              | 40  | F      | 3        | 2         | Ph1-Chr present (100%)                                            | Gleevec               | CCyR (5 Mo)                                                        | No                                                               |
| 30        | CP              | 65  | M      | 2        | 2         | Ph1 Chr 99.6% interphase cells karyotype, extra copy Ph1-Chr 0.4% | Gleevec               | No                                                                 | No                                                               |
| 31        | CP              | 67  | M      | 3        | 2         | Ph1+ karyotype, FISH 99% interphase cells                         | Gleevec               | No                                                                 | No                                                               |
| 32        | CP              | 19  | F      | 2        | 1         | Ph1+ karyotype, FISH 84.5% interphase cells                       | Gleevec               | CCyR (4 Mo)                                                        | CMR (8Mo)                                                        |
| 33        | CP              | 54  | F      | 4        | 2         | Ph1+ karyotype, FISH 51.2% interphase cells                       | Gleevec               | No                                                                 | No                                                               |
| 34        | CP              | 47  | M      | 2        | 2         | Ph1-Chr present (100%)                                            | Hydroxyurea, Gleevec  | No                                                                 | No                                                               |
| 35        | CP              | 32  | F      | 1        | 2         | Ph1+ karyotype, FISH 99.25% interphase cells                      | Gleevec               | CCyR (3 Mo)                                                        | CMR (18 Mo)                                                      |
| 36        | CP              | 44  | M      | 3        | 2         | Ph1+ karyotype, FISH 99.2% interphase cells                       | Gleevec               | CCyR (4 Mo)                                                        | No                                                               |
| 37        | CP              | 41  | M      | 1        | 1         | Ph1+ karyotype, FISH 100% interphase cells                        | Gleevec               | CCyR (11 Mo)                                                       | CMR (14 Mo)                                                      |
| 38        | CP              | 67  | M      | 1        | 2         | Ph1+ karyotype, FISH 76.2% interphase cells                       | Gleevec               | CCyR (3 Mo)                                                        | No                                                               |
| 39        | CP              | 55  | M      | 6        | 2         | Ph1-Chr present (100%)                                            | Hydroxyurea Gleevec   | CCyR (5 Mo)                                                        | CMR (17Mo)                                                       |
| 40        | CP              | 71  | M      | 1        | 2         | Ph1+ karyotype, FISH 100% interphase cells                        | Gleevec               | CCyR (3 Mo)                                                        | No                                                               |
| 41        | CP              | 59  | F      | 2        | 2         | Ph1-Chr present (100%)                                            | Gleevec               | No                                                                 | No                                                               |

<sup>a</sup> CP : chronic phase<sup>b</sup> Chr : chromosome<sup>c</sup> CCyR: complete cytogenetic response<sup>d</sup> CMR : complete molecular response

## Supplementary Table 4 Clinical and immunohistochemical characteristics of CML patients

| Patient # | Phase | Age | Gender | % Blasts | PML Score | Cytoagenesis at diagnosis                                                        | Therapy              | Cytogenetic response status<br>(Interval since diagnosis - months) | Molecular response status<br>(Interval since diagnosis - months) |
|-----------|-------|-----|--------|----------|-----------|----------------------------------------------------------------------------------|----------------------|--------------------------------------------------------------------|------------------------------------------------------------------|
| 42        | CP    | 24  | M      | 1        | 2         | Ph1+ karyotype, FISH 100% interphase cells                                       | Gleevec              | CCyR (6 Mo)                                                        | No                                                               |
| 43        | CP    | 38  | M      | 3        | 2         | Ph1+ karyotype, FISH 100% interphase cells                                       | Gleevec              | CCyR (6 Mo)                                                        | No                                                               |
| 44        | CP    | 62  | M      | 2        | 2         | Ph1+ karyotype, FISH 100% interphase cells                                       | Gleevec              | CCyR (4 Mo)                                                        | No                                                               |
| 45        | CP    | 40  | M      | 2        | 1         | Ph1 chromosome present (100%)                                                    | Gleevec              | CCyR (6 Mo)                                                        | CMR (18 Mo)                                                      |
| 46        | CP    | 83  | F      | 2        | 2         | Ph1+ karyotype, FISH 100% interphase cells                                       | Gleevec              | CCyR (6 Mo)                                                        | No                                                               |
| 47        | CP    | 46  | F      | 1        | 2         | Ph1+ karyotype, FISH 94% interphase cells                                        | Gleevec              | CCyR (6 Mo)                                                        | No                                                               |
| 48        | CP    | 55  | F      | 1        | 2         | Ph1+ karyotype, FISH 100% interphase cells                                       | Gleevec              | CCyR (6 Mo)                                                        | No                                                               |
| 49        | CP    | 53  | F      | 3        | 1         | Ph1-Chr present (98%)                                                            | Gleevec              | CCyR (8 Mo)                                                        | CMR (15 Mo)                                                      |
| 50        | CP    | 47  | M      | 2        | 2         | t(9;22)(q34;q11);add(19)(p11)                                                    | Gleevec              | CCyR (6 Mo)                                                        | No                                                               |
| 51        | CP    | 53  | M      | 1        | 2         | Ph1 Chr 98% interphase cells karyotype                                           | Gleevec              | No                                                                 | No                                                               |
| 52        | CP    | 56  | F      | 1        | 2         | Ph1 Chr 100% interphase cells karyotype                                          | Gleevec              | CCyR (5 Mo)                                                        | No                                                               |
| 53        | CP    | 46  | F      | 1        | 2         | Ph1 Chr 99.8% interphase cells karyotype, extra copy Ph1-Chr 0.2%                | Gleevec              | CCyR (10 Mo)                                                       | No                                                               |
| 54        | CP    | 35  | M      | 1        | 2         | Ph1-Chr present (100%)                                                           | Gleevec              | CCyR (3 Mo)                                                        | No                                                               |
| 55        | CP    | 25  | M      | 3        | 2         | Ph1+ karyotype, FISH 32% interphase cells                                        | Gleevec; BMT         | CCyR (6 Mo)                                                        | No                                                               |
| 56        | CP    | 73  | M      | 1        | 2         | Ph1-Chr present (100%)                                                           | Gleevec              | CCyR (10 Mo)                                                       | No                                                               |
| 57        | CP    | 48  | M      | 1        | 2         | Ph1 Chr 100% interphase cells karyotype, FISH 100% interphase cells              | Gleevec              | CCyR (3 Mo)                                                        | No                                                               |
| 58        | CP    | 61  | F      | 3        | 2         | Ph1 Chr 20% interphase cells karyotype, FISH 36.4% interphase cells              | Gleevec              | No                                                                 | No                                                               |
| 59        | CP    | 32  | M      | 2        | 2         | Ph1+ karyotype, FISH 100% interphase cells                                       | Gleevec              | CCyR (11 Mo)                                                       | CMR (19 Mo)                                                      |
| 60        | CP    | 69  | M      | 1        | 2         | Ph1 Chr 14% interphase cells karyotype, FISH 17% interphase cells                | Gleevec              | No                                                                 | No                                                               |
| 61        | CP    | 33  | F      | 2        | 2         | Ph1 Chr 5% interphase cells karyotype, FISH 4% interphase cells                  | Gleevec              | CCyR (6 Mo)                                                        | No                                                               |
| 62        | CP    | 22  | F      | 1        | 2         | Ph1 Chr 99.8% interphase cells karyotype                                         | Gleevec              | CCyR (8 Mo)                                                        | No                                                               |
| 63        | CP    | 69  | F      | 3        | 2         | Ph1 Chr 70% interphase cells karyotype, der(9)t(9;22)t(4;9), Trisomy Chr-8 (26%) | Gleevec              | CCyR (3 Mo)                                                        | No                                                               |
| 64        | CP    | 57  | M      | 3        | 1         | Ph1-Chr present (100%)                                                           | Gleevec              | CCyR (3 Mo)                                                        | CMR (13 Mo)                                                      |
| 65        | CP    | 53  | F      | 3        | 2         | Ph1 Chr 99.4% interphase cells karyotype, extra copy Ph1-Chr 0.6%                | Gleevec              | No                                                                 | No                                                               |
| 66        | CP    | 31  | M      | 2        | 2         | Ph1 Chr 100% interphase cells karyotype                                          | Gleevec              | CCyR (3 Mo)                                                        | CMR (14 Mo)                                                      |
| 67        | CP    | 32  | M      | 2        | 2         | Ph1 Chr 100% interphase cells karyotype                                          | Gleevec              | No                                                                 | No                                                               |
| 68        | CP    | 53  | F      | 1        | 2         | Ph1+ karyotype, FISH 99% interphase cells                                        | Gleevec              | CCyR (6 Mo)                                                        | No                                                               |
| 69        | CP    | 47  | M      | 1        | 2         | Ph1+ karyotype, FISH 94% interphase cells                                        | Gleevec              | CCyR (4 Mo)                                                        | No                                                               |
| 70        | CP    | 30  | F      | 1        | 2         | Ph1+ karyotype, FISH 94.4% interphase cells                                      | Gleevec              | CCyR (7 Mo)                                                        | No                                                               |
| 71        | CP    | 64  | M      | 1        | 2         | Ph1 Chr 100% interphase cells karyotype                                          | Hydroxyurea, Gleevec | CCyR (3 Mo)                                                        | No                                                               |
| 72        | CP    | 50  | F      | 0        | 2         | Ph1+ karyotype, Monosomy Chr-7 (20%), Trisomy c-8 (5.75%)                        | BMT; Gleevec         | CCyR (6 Mo)                                                        | No                                                               |
| 73        | CP    | 37  | M      | 1        | 2         | Ph1+ karyotype, FISH 99% interphase cells                                        | Gleevec              | No                                                                 | No                                                               |
| 74        | CP    | 40  | F      | 2        | 2         | Ph1+ karyotype, FISH 100% interphase cells                                       | Gleevec              | CCyR (4 Mo)                                                        | No                                                               |
| 75        | CP    | 41  | M      | 2        | 0         | Ph1-Chr present (100%)                                                           | Gleevec              | CCyR (3 Mo)                                                        | CMR (12 Mo)                                                      |
| 76        | CP    | 49  | F      | 3        | 2         | Ph1+ karyotype, FISH 100% interphase cells                                       | Gleevec              | CCyR (7 Mo)                                                        | No                                                               |
| 77        | CP    | 47  | M      | 1        | 2         | Ph1+ karyotype, FISH 98.5% interphase cells                                      | Gleevec              | CCyR (4 Mo)                                                        | No                                                               |
| 78        | CP    | 54  | M      | 0        | 2         | Ph1 Chr 100% interphase cells karyotype, FISH 100% interphase cells              | BMT                  | CCyR (3 Mo)                                                        | No                                                               |
| 79        | CP    | 57  | M      | 1        | 2         | Ph1+ karyotype, FISH 85% interphase cells                                        | Gleevec              | CCyR (4 Mo)                                                        | No                                                               |
| 80        | CP    | 58  | M      | 2        | 1         | Ph1 chromosome present (100%)                                                    | Gleevec              | CCyR (4 Mo)                                                        | CMR (9 Mo)                                                       |
| 81        | CP    | 59  | M      | 2        | 1         | Ph1-Chr present (96%)                                                            | Gleevec              | CCyR (6 Mo)                                                        | No                                                               |
